# Supplementary material for: SUV-quantification of physiological lung tissue in an integrated PET/MR-system: Impact of lung density and bone tissue
Source: PubMed Central journal article supplement (PMC5451041; doi:10.1371/journal.pone.0177856), 2017-05-31
Supplement: pone.0177856.s003.pdf [file pone.0177856.s003.pdf]

Table 3: SUVmean in different lung regions in PET\_MRLUNG\_NOBONE

| <b>Patients</b> | <b>1</b> | <b>2</b> | <b>3</b> | <b>4</b> | <b>5</b> | <b>6</b> | <b>7</b> | <b>8</b> | <b>9</b> | <b>10</b> | <b>11</b> | <b>12</b> |
|-----------------|----------|----------|----------|----------|----------|----------|----------|----------|----------|-----------|-----------|-----------|
| <b>1</b>        | 0,39     | 0,43     | 0,57     | 0,42     | 0,36     | 0,58     | 0,47     | 0,36     | 0,45     | 0,33      | 0,40      | 0,57      |
| <b>2</b>        | 0,34     | 0,36     | 0,66     |          |          |          | 0,40     | 0,35     | 0,48     |           |           |           |
| <b>3</b>        | 0,39     | 0,32     | 0,50     | 0,40     | 0,30     | 0,48     | 0,32     | 0,31     | 0,44     | 0,39      | 0,39      | 0,38      |
| <b>4</b>        | 0,32     | 0,45     | 0,39     | 0,40     | 0,40     | 0,45     | 0,35     | 0,37     | 0,38     | 0,37      | 0,39      | 0,38      |
| <b>5</b>        | 0,28     | 0,23     | 0,36     | 0,30     | 0,27     | 0,42     | 0,20     | 0,20     | 0,40     | 0,25      | 0,30      | 0,32      |
| <b>6</b>        | 0,29     | 0,27     | 0,29     | 0,27     | 0,26     | 0,28     | 0,27     | 0,30     | 0,34     | 0,35      | 0,27      | 0,28      |
| <b>7</b>        | 0,35     | 0,32     | 0,41     | 0,50     | 0,34     | 0,32     | 0,38     | 0,29     | 0,30     | 0,47      | 0,43      | 0,33      |
| <b>8</b>        | 0,33     | 0,42     | 0,31     | 0,22     | 0,21     | 0,41     |          |          |          |           |           |           |
| <b>9</b>        | 0,21     | 0,21     | 0,23     | 0,26     | 0,20     | 0,34     | 0,25     | 0,22     | 0,24     | 0,25      | 0,24      | 0,28      |
| <b>10</b>       | 0,38     | 0,33     | 0,51     | 0,44     | 0,40     | 0,54     | 0,32     | 0,35     | 0,46     | 0,47      | 0,35      | 0,45      |
| <b>11</b>       | 0,29     | 0,29     | 0,27     | 0,26     | 0,24     | 0,23     | 0,24     | 0,22     | 0,22     | 0,23      | 0,24      | 0,24      |
| <b>12</b>       | 0,44     | 0,30     | 0,48     | 0,34     | 0,44     | 0,60     | 0,35     | 0,45     | 0,31     | 0,35      | 0,46      | 0,34      |
| <b>13</b>       | 0,31     | 0,31     | 0,42     | 0,36     | 0,35     | 0,37     | 0,31     | 0,33     | 0,50     | 0,24      | 0,35      | 0,35      |
| <b>14</b>       | 0,34     | 0,32     | 0,38     | 0,34     | 0,30     | 0,36     | 0,27     | 0,27     | 0,31     | 0,34      | 0,41      | 0,39      |
| <b>15</b>       | 0,27     | 0,34     | 0,35     | 0,32     | 0,28     | 0,37     | 0,28     | 0,22     | 0,30     | 0,32      | 0,25      | 0,49      |

| <b>No</b>  | <b>Lung region</b>     |
|------------|------------------------|
| 1-6        | Hilus                  |
| 7-12       | Basal                  |
| 1-3; 7-9   | Right lung             |
| 4-6; 10-12 | Left lung              |
| 1,4,7,10   | anterior lung regions  |
| 2,5,8,11   | middle lung regions    |
| 3,6,9,12   | posterior lung regions |
