# Supplementary material for: SUV-quantification of physiological lung tissue in an integrated PET/MR-system: Impact of lung density and bone tissue
Source: PubMed Central journal article supplement (PMC5451041; doi:10.1371/journal.pone.0177856), 2017-05-31
Supplement: pone.0177856.s005.pdf [file pone.0177856.s005.pdf]

Table 5: Analysis of lung density

| Patients | AL   | ML   | BL   | AR   | MR   | BR   |     |
|----------|------|------|------|------|------|------|-----|
| 1        | -797 | -811 | -820 | -819 | -828 | -828 | MLD |
|          | 113  | 144  | 111  | 118  | 130  | 115  | SD  |
| 2        | -779 | -721 | -726 | -805 | -768 | -766 | MLD |
|          | 139  | 167  | 146  | 104  | 154  | 142  | SD  |
| 3        | -766 | -770 | -764 | -779 | -780 | -765 | MLD |
|          | 157  | 157  | 133  | 101  | 144  | 128  | SD  |
| 4        | -856 | -830 | -811 | -856 | -831 | -835 | MLD |
|          | 113  | 169  | 125  | 115  | 182  | 121  | SD  |
| 5        | -816 | -846 | -844 | -820 | -837 | -856 | MLD |
|          | 156  | 155  | 149  | 125  | 165  | 119  | SD  |
| 6        | -794 | -784 | -787 | -788 | -775 | -782 | MLD |
|          | 102  | 154  | 111  | 103  | 162  | 112  | SD  |
| 7        | -815 | -799 | -802 | -817 | -804 | -809 | MLD |
|          | 124  | 174  | 128  | 122  | 176  | 123  | SD  |
| 8        | -611 | -572 | -573 | -657 | -647 | -624 | MLD |
|          | 147  | 200  | 141  | 144  | 183  | 155  | SD  |
| 9        | -827 | -836 | -839 | -820 | -815 | -844 | MLD |
|          | 123  | 146  | 122  | 125  | 170  | 112  | SD  |
| 10       | -756 | -729 | -651 | -771 | -742 | -718 | MLD |
|          | 158  | 159  | 168  | 126  | 187  | 162  | SD  |
| 11       | -830 | -817 | -831 | -827 | -823 | -834 | MLD |
|          | 102  | 170  | 104  | 110  | 163  | 98   | SD  |
| 12       | -795 | -788 | -780 | -786 | -784 | -777 | MLD |
|          | 115  | 152  | 113  | 116  | 152  | 107  | SD  |
| 13       | -812 | -788 | -780 | -806 | -778 | -762 | MLD |
|          | 118  | 172  | 138  | 116  | 172  | 138  | SD  |
| 14       | -747 | -728 | -746 | -760 | -732 | -757 | MLD |
|          | 137  | 163  | 122  | 123  | 173  | 121  | SD  |
| 15       | -847 | -824 | -798 | -857 | -844 | -845 | MLD |
|          | 131  | 178  | 167  | 116  | 169  | 128  | SD  |
