# Supplementary material for: SUV-quantification of physiological lung tissue in an integrated PET/MR-system: Impact of lung density and bone tissue
Source: PubMed Central journal article supplement (PMC5451041; doi:10.1371/journal.pone.0177856), 2017-05-31
Supplement: pone.0177856.s006.pdf [file pone.0177856.s006.pdf]

Table 6: Hounsfield Units

| Patients | 1      | 2      | 3      | 4      | 5      | 6      | 7      | 8      | 9      | 10     | 11     | 12     |
|----------|--------|--------|--------|--------|--------|--------|--------|--------|--------|--------|--------|--------|
| 1        | -747,6 | -800,4 | -773,9 | -780,0 | -768,8 | -774,6 | -814,4 | -674,8 | -757,8 | -769,7 | -704,3 | -757,6 |
| 2        | -823,7 | -760,5 | -545,0 |        |        |        | -842,6 | -575,7 | -661,6 |        |        |        |
| 3        | -733,0 | -740,2 | -668,8 | -720,5 | -747,7 | -656,2 | -804,7 | -710,4 | -684,1 | -708,0 | -703,8 | -562,9 |
| 4        | -793,1 | -798,9 | -775,2 | -797,0 | -777,0 | -801,0 | -814,1 | -833,8 | -716,2 | -863,0 | -802,7 | -786,0 |
| 5        | -846,7 | -866,2 | -829,1 | -849,8 | -785,4 | -854,1 | -895,1 | -715,4 | -857,6 | -881,7 | -891,8 | -844,4 |
| 6        | -767,9 | -796,8 | -666,1 | -763,1 | -769,3 | -739,9 | -816,7 | -770,5 | -675,4 | -779,7 | -749,5 | -664,7 |
| 7        | -776,2 | -666,2 | -691,3 | -755,0 | -818,7 | -668,0 | -766,5 | -632,6 | -568,6 | -782,4 | -736,0 | -732,3 |
| 8        | -715,9 | -741,2 | -611,6 | -716,5 | -633,3 | -389,3 |        |        |        |        |        |        |
| 9        | -802,4 | -787,7 | -648,7 | -810,8 | -778,5 | -796,2 | -827,1 | -725,3 | -730,7 | -763,2 | -800,6 | -745,2 |
| 10       | -770,3 | -754,3 | -709,5 | -818,9 | -776,1 | -763,2 | -775,8 | -794,9 | -794,9 | -783,2 | -770,3 | -552,0 |
| 11       | -778,2 | -753,4 | -595,5 | -775,1 | -715,8 | -518,8 | -825,2 | -727,2 | -825,2 | -755,3 | -678,9 | -509,9 |
| 12       | -708,5 | -749,4 | -709,6 | -848,6 | -753,9 | -732,2 | -747,4 | -794,2 | -734,7 | -749,1 | -596,8 | -716,2 |
| 13       | -774,3 | -693,7 | -502,8 | -777,6 | -698,5 | -621,6 | -764,7 | -751,2 | -393,2 | -769,1 | -760,1 | -522,2 |
| 14       | -682,0 | -807,8 | -719,5 | -665,0 | -741,1 | -747,4 | -777,3 | -759,0 | -637,5 | -715,0 | -725,0 | -575,6 |
| 15       | -850,9 | -855,6 | -800,2 | -858,6 | -766,9 | -855,0 | -879,7 | -883,6 | -696,9 | -832,0 | -769,6 | -842,3 |

| No         | Lung region            |
|------------|------------------------|
| 1-6        | Hilus                  |
| 7-12       | Basal                  |
| 1-3; 7-9   | Right lung             |
| 4-6; 10-12 | Left lung              |
| 1,4,7,10   | anterior lung regions  |
| 2,5,8,11   | middle lung regions    |
| 3,6,9,12   | posterior lung regions |

Patients examined with contrast-enhanced CT  
 Patients examined with non-contrast-enhanced CT
